# Supplementary material
Source: PubMed Central journal article supplement (PMC5417828)

# Supplementary Figure 3

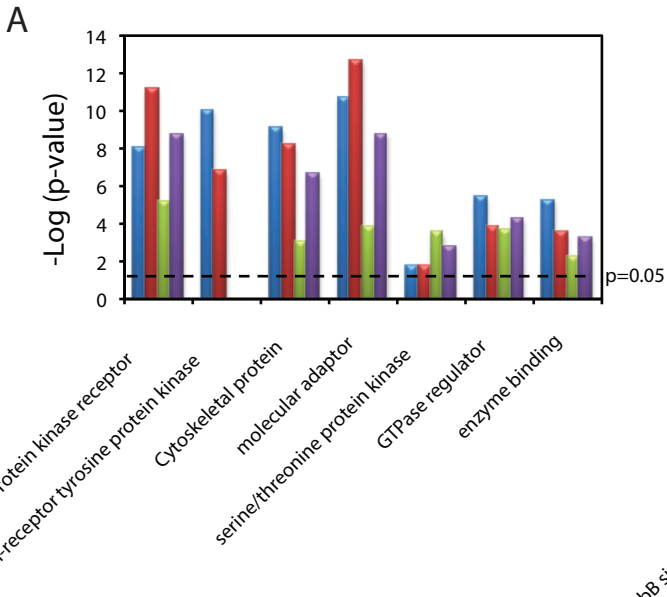

- Dephosphorylated sites with erlotinib in sensitive cell lines
- Dephosphorylated sites with afatinib in sensitive cell lines
- Dephosphorylated sites with erlotinib in resistant cell line
- Dephosphorylated sites with afatinib in resistant cell line

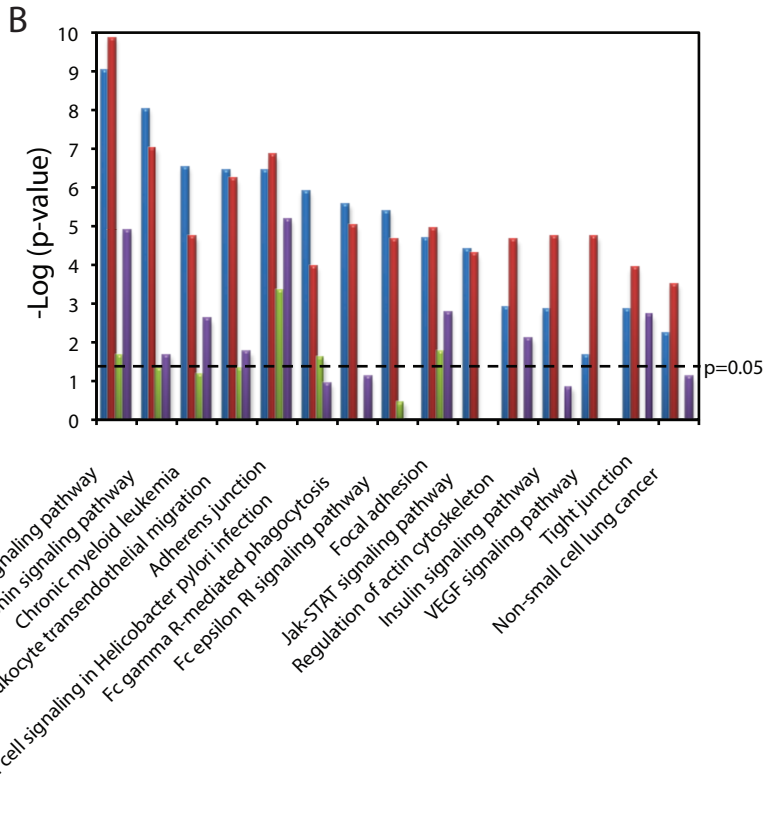

Supplement: 10.1074_M117.067439_mcp.M117.067439-3.pdf [file 10.1074_M117.067439_mcp.M117.067439-3.pdf]
