# Supplementary material
Source: PubMed Central journal article supplement (PMC5417828)

# Supplementary Figure 1

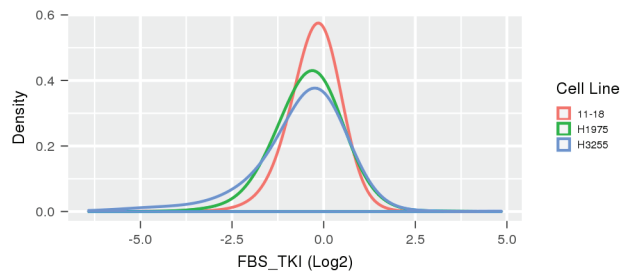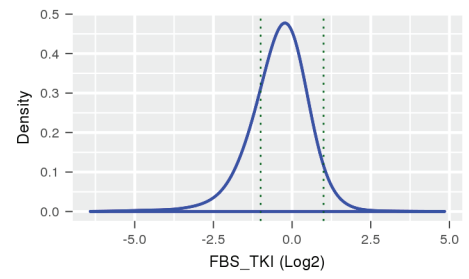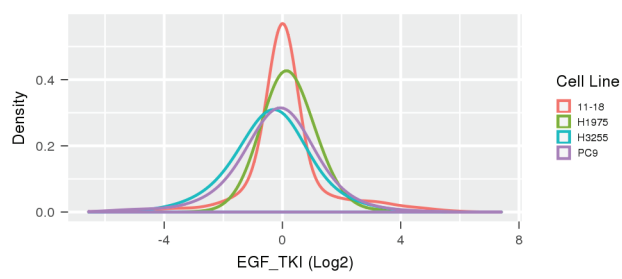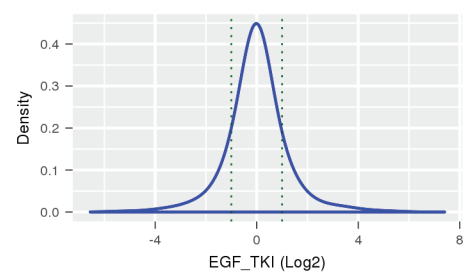

Supplement: 10.1074_M117.067439_mcp.M117.067439-1.pdf [file 10.1074_M117.067439_mcp.M117.067439-1.pdf]

## Supplementary Figure 2

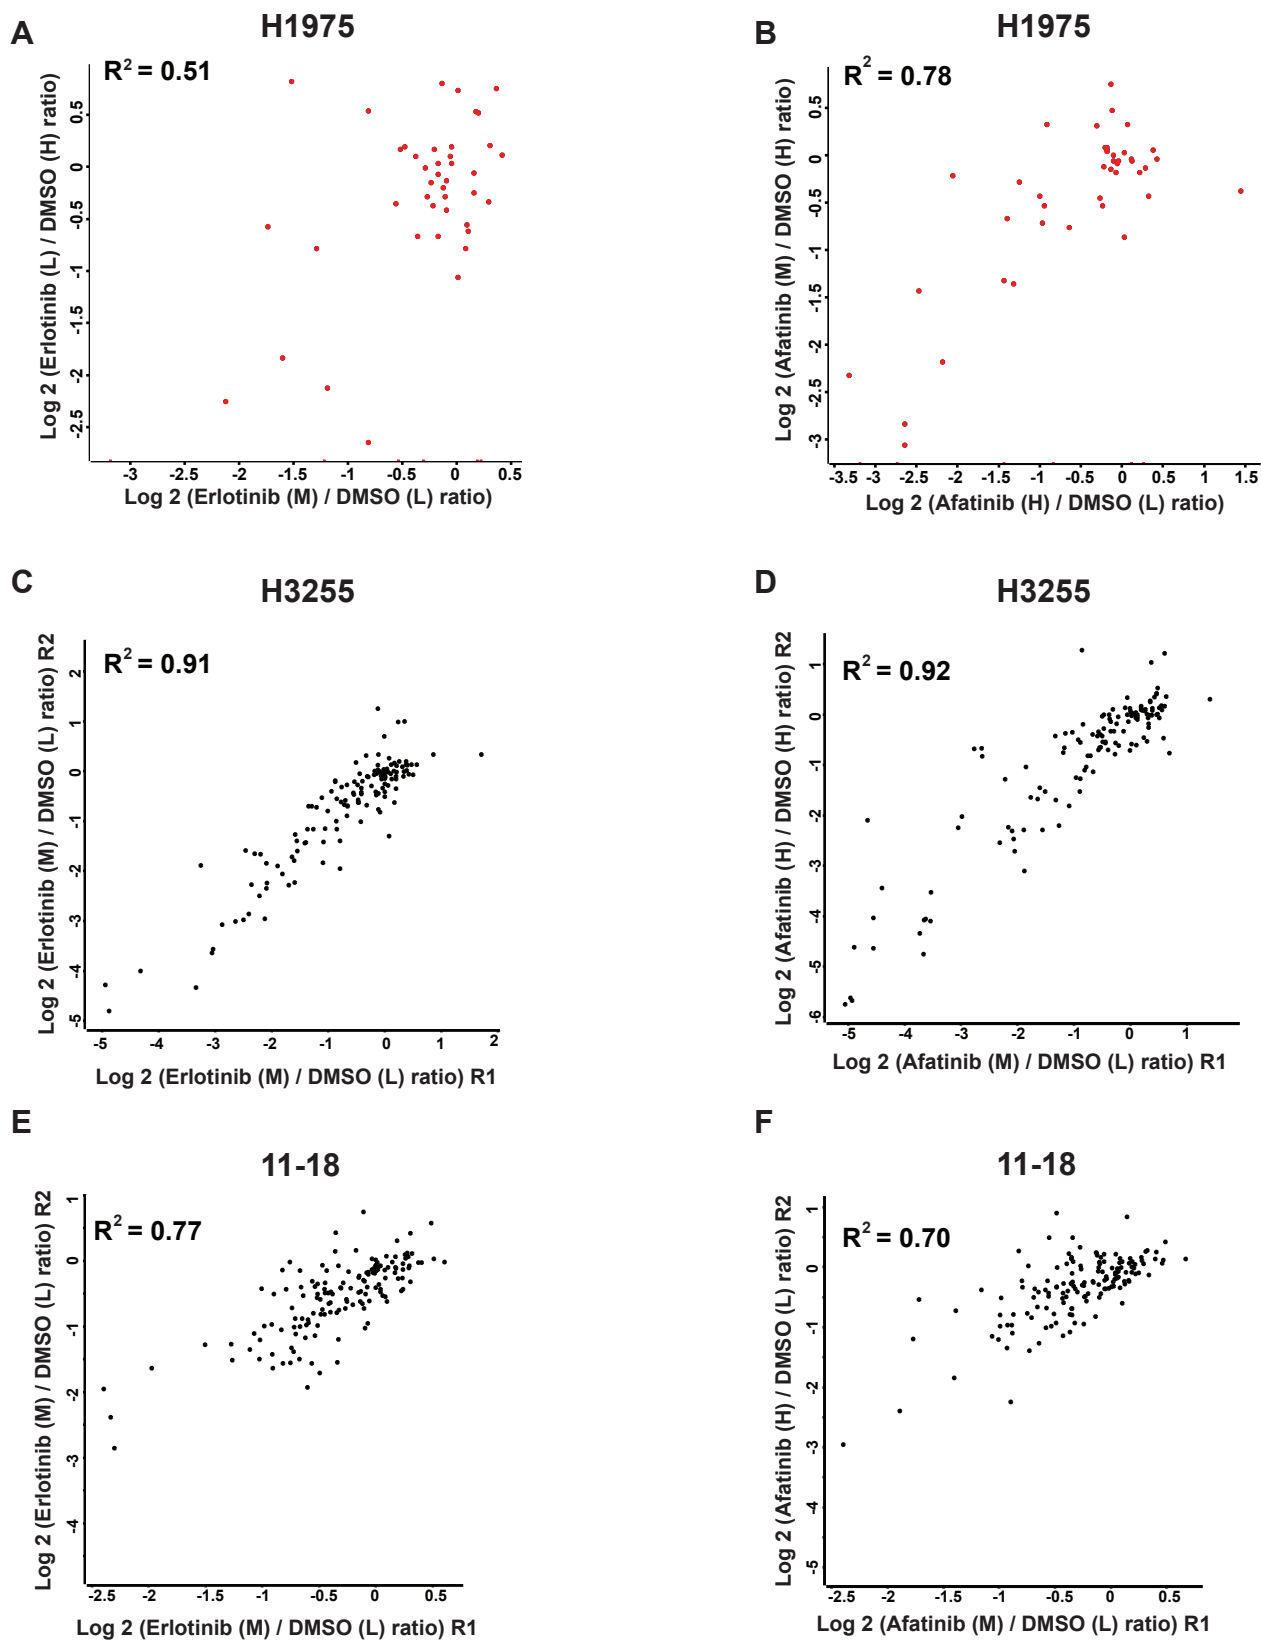

Supplement: 10.1074_M117.067439_mcp.M117.067439-2.pdf [file 10.1074_M117.067439_mcp.M117.067439-2.pdf]

Supplementary Figure 5

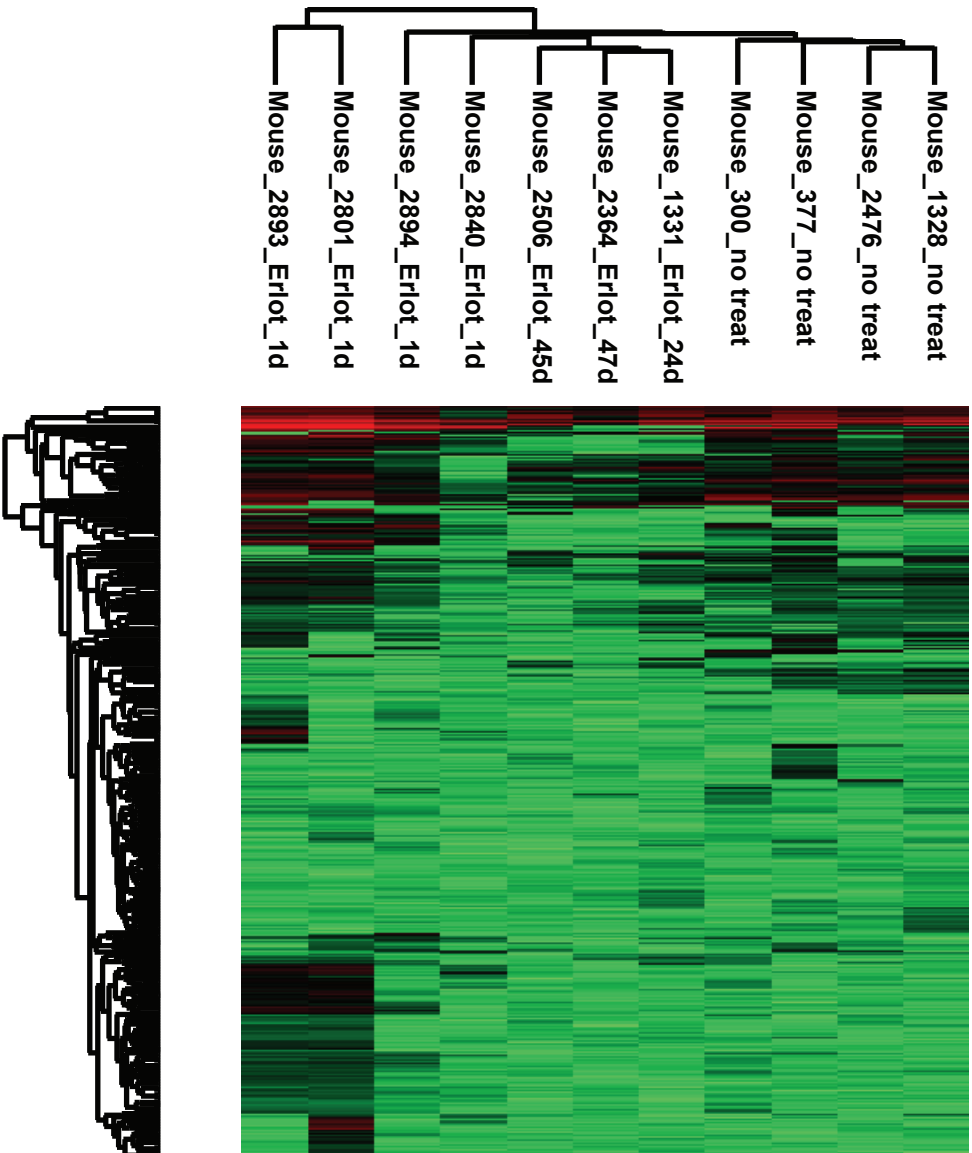

Supplement: 10.1074_M117.067439_mcp.M117.067439-5.pdf [file 10.1074_M117.067439_mcp.M117.067439-5.pdf]

# Supplementary Figure 6

**A**

H3255 EGF/SS ↓ Erlot+EGF/EGF ↑

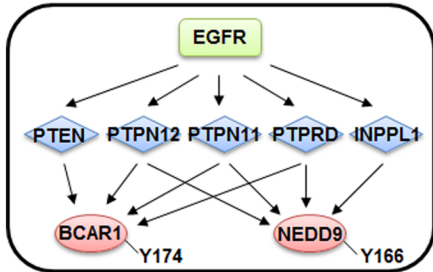

**B**

H1975 EGF/SS ↓ Erlot+EGF/EGF ↔

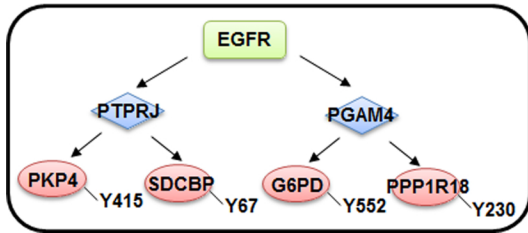

**C**

H1975 EGF/SS ↓ Erlot+EGF/EGF ↑

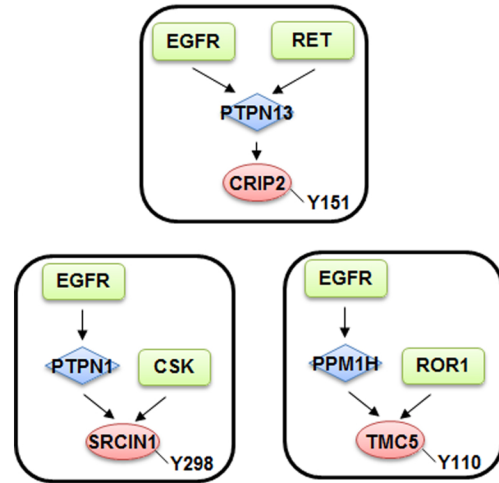

Supplement: 10.1074_M117.067439_mcp.M117.067439-6.pdf [file 10.1074_M117.067439_mcp.M117.067439-6.pdf]

# Supplementary Figure 7

H1975 (L858R/T790M EGFR)  
FBS\_Erlotinib\_Afatinib

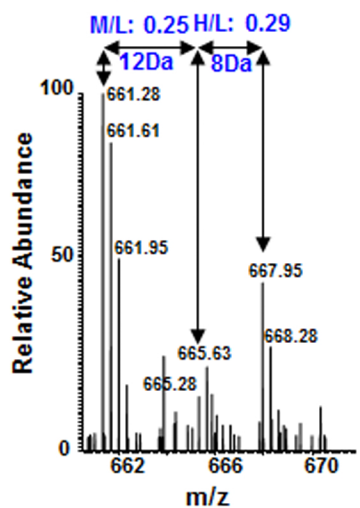

H1975 (L858R/T790M EGFR)  
SS\_EGFR\_Erlotinib

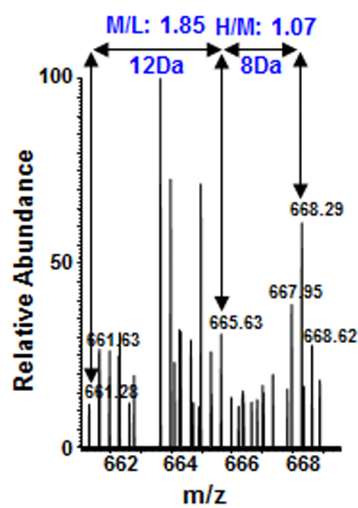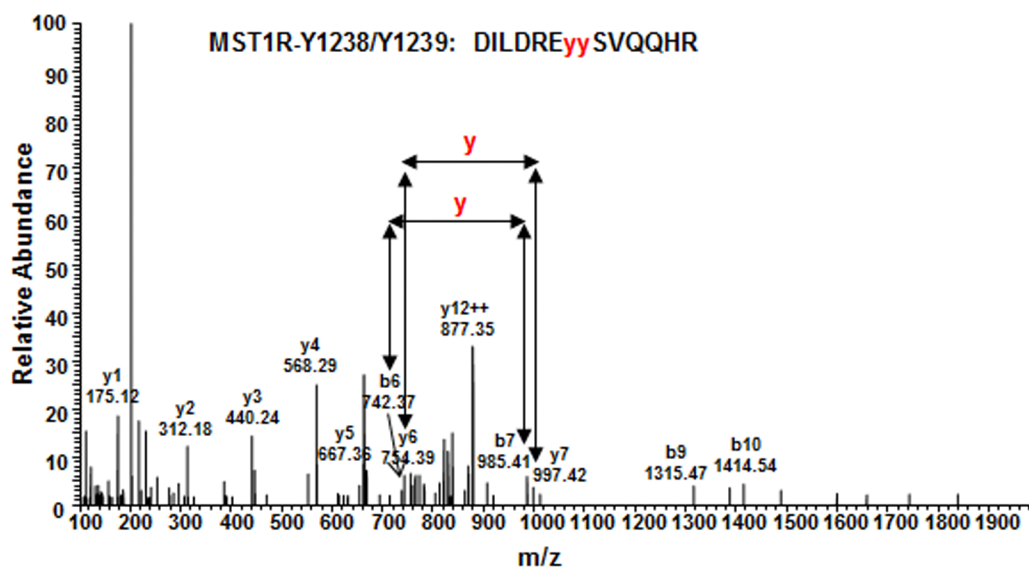

Supplement: 10.1074_M117.067439_mcp.M117.067439-7.pdf [file 10.1074_M117.067439_mcp.M117.067439-7.pdf]

# Supplementary Figure 8

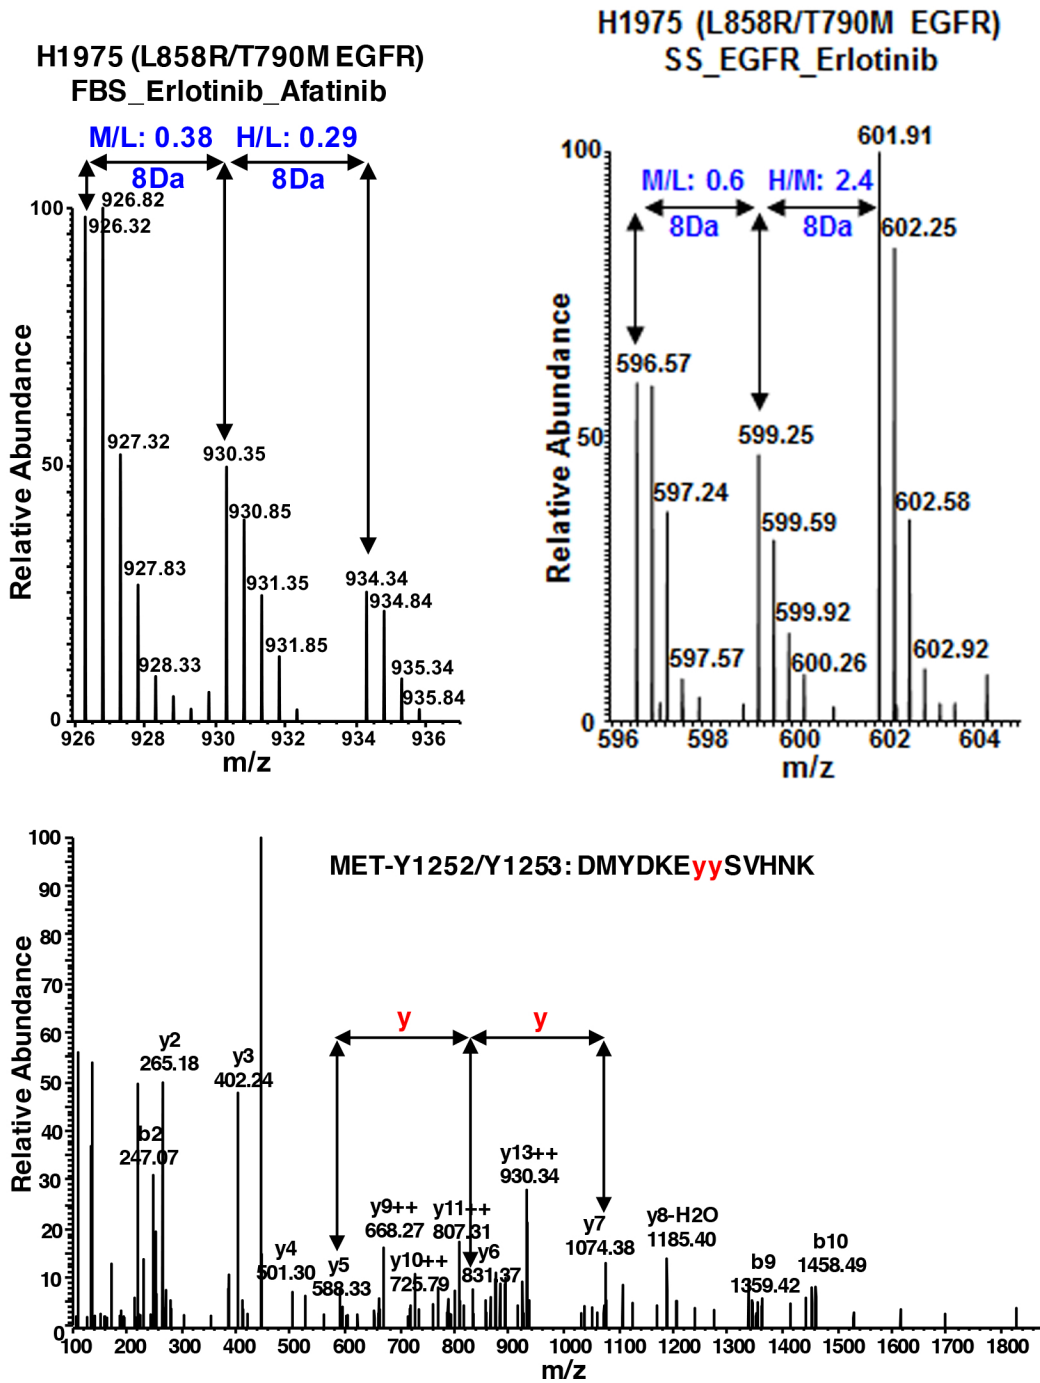

Supplement: 10.1074_M117.067439_mcp.M117.067439-8.pdf [file 10.1074_M117.067439_mcp.M117.067439-8.pdf]
